# 1 Large scale interrogation of retinal cell functions by 1-photon light-sheet microscopy

2

3 Suva Roy<sup>1\*</sup>, Depeng Wang<sup>2,3</sup>, Andra M. Rudzite<sup>1</sup>, Benjamin Perry<sup>2</sup>, Miranda L. Scalabrino<sup>1</sup>,  
4 Mishek Thapa<sup>1</sup>, Yiyang Gong<sup>2</sup>, Alexander Sher<sup>4</sup>, Greg D. Field<sup>1</sup>

5

6 1. Department of Neurobiology, Duke University School of Medicine, Durham, NC, USA

7 2. Department of Biomedical Engineering, Duke University, Durham, NC, USA

8 3. Current address: College of Energy and Power Engineering, Nanjing University of Aeronautics  
9 and Astronautics, Nanjing, China

10 4. Santa Cruz Institute for Particle Physics, University of California, Santa Cruz, Santa Cruz, CA,  
11 USA

12 \*Correspondence: Suva Roy, [suva.roy@duke.edu](mailto:suva.roy@duke.edu)

13

## 14 Abstract

15

16 Visual processing in the retina depends on the collective activity of large ensembles of  
17 neurons organized in different layers. Current techniques for measuring activity of layer-specific  
18 neural ensembles rely on expensive pulsed infrared lasers to drive 2-photon activation of calcium-  
19 dependent fluorescent reporters. Here, we present a 1-photon light-sheet imaging system that can  
20 measure the activity in hundreds of *ex vivo* retinal neurons over a large field of view while  
21 simultaneously presenting visual stimuli. This allowed for a reliable functional classification of  
22 different retinal ganglion cell types. We also demonstrate that the system has sufficient resolution  
23 to image calcium entry at individual synaptic release sites across the axon terminals of dozens of  
24 simultaneously imaged bipolar cells. The simple design, a large field of view, and fast image  
25 acquisition, make this a powerful system for high-throughput and high-resolution measurements  
26 of retinal processing at a fraction of the cost of alternative approaches.

27

## 28 Introduction

29

30 Imaging fluorescence activity of reporters targeted to genetically defined cell types has  
31 greatly expanded the kinds of measurements available in neuroscience. For example, calcium  
32 imaging allows measuring neural activity across hundreds to thousands of neurons  
33 simultaneously<sup>1,2</sup>. It also allows measuring signals at individual synapses and within sub-cellular

34 compartments such as dendrites<sup>3</sup> without rupturing the cell membrane. However, fluorescence  
35 imaging relies on delivering large amounts of light to excite the fluorescent reporter. In the retina,  
36 this presents a problem because the excitation light will also drive phototransduction in rod and  
37 cone photoreceptors. To overcome this challenge, previous studies have relied on infrared 2-  
38 photon excitation of fluorescent reporters<sup>1,4,5</sup>. This greatly reduces photoreceptor activation and  
39 allows imaging changes in fluorescence of downstream neurons, while stimulating the  
40 photoreceptors in the visible spectrum<sup>6,7</sup>. A drawback of this approach is that it requires  
41 femtosecond pulsed infrared lasers, which are expensive to acquire and maintain.

42 We have developed a 1-photon light-sheet imaging system for *ex vivo* retinal  
43 measurements, that has a simple setup and uses a much less expensive laser. The excitation light  
44 is restricted to a relatively large (2.25 mm<sup>2</sup>) and thin plane, thus allowing hundreds of retinal  
45 neurons to be imaged simultaneously and calcium signals to be resolved at the level of individual  
46 synapses. The system leverages the laminar organization of the retina: photoreceptors are in one  
47 cellular lamina, retinal interneurons are in a central lamina (containing horizontal, bipolar and  
48 amacrine cells), and the retinal ganglion cell (RGC) layer forms a third cellular lamina (containing  
49 amacrine and ganglion cells). Between these layers of cell bodies, there are two synaptic laminae:  
50 the outer plexiform layer between photoreceptors and interneurons, and the inner plexiform layer  
51 (IPL) between interneurons and RGCs<sup>8</sup>. The light-sheet can be directed to a lamina not containing  
52 photoreceptors, thereby reducing photoreceptor activation. While a small fraction of the  
53 fluorescence excitation light does reach the photoreceptors, it is not efficiently absorbed by the  
54 mouse short-wavelength sensitive (S-) opsin<sup>9</sup>. This opsin is expressed at high levels by all cones  
55 in the ventral mouse retina. Thus, calcium-dependent changes in fluorescence can be measured in  
56 retinal interneurons or RGCs in ventral mouse retina while stimulating the cone photoreceptors  
57 with near-ultraviolet light. The mouse has become a major model of visual processing because of  
58 its tractable genetics, making this system well-suited to a wide variety of retinal studies<sup>10</sup>.

59 We demonstrate and validate the utility of the system in two ways. First, we used mice that  
60 express Cre recombinase under the control of parvalbumin promoter (PVCre) to express GCaMP6f  
61 in a subset of RGCs. We presented a battery of visual stimuli including a full-field amplitude and  
62 frequency modulated stimulus (a.k.a. ‘chirp’ stimulus)<sup>1</sup>, moving bars, checkerboard noise, full-  
63 field light steps and local bright/dark spots, while imaging calcium-dependent changes in  
64 fluorescence. We were able to functionally classify the GCaMP6f expressing RGCs into eight

65 distinct types, consistent with anatomical studies of PV-expressing RGCs<sup>11,12</sup>. Second, we used  
66 mice that express Cre recombinase under the control of PCP2 promoter (PCP2Cre) to express  
67 GCaMP6f in a subset of bipolar cells (BCs). We were able to resolve hundreds of individual  
68 synaptic release sites in BC axons terminals, measure calcium responses to visual stimuli, and  
69 functionally classify bipolar cells into an ON (type-6) and an OFF (type-2) type, consistent with  
70 previous studies<sup>13</sup>. These results demonstrate that 1-photon light-sheet imaging system is a  
71 relatively affordable and viable platform for monitoring and functionally characterizing neural  
72 activity across large populations of retinal neurons.

73

## 74 **Results**

75

### 76 *1-photon light-sheet microscope for stimulus delivery and retinal imaging*

77 The microscope system features three main units: (1) a light-sheet fluorescence excitation  
78 system, (2) a fluorescence emission detection system, and (3) a visual stimulus delivery system  
79 (Fig. 1a). The collimated beam from the laser is transformed by a set of relay lenses and a  
80 cylindrical lens to generate a Gaussian light-sheet that is focused by the illumination objective at  
81 the position of the sample. The lateral and longitudinal extent of the light-sheet is controlled by a  
82 set of apertures. The thickness of the light-sheet is controlled by a horizontal slit and the numerical  
83 aperture of the illumination objective. The center of the excitation plane is aligned with the  
84 detection axis by adjusting the position of the illumination objective (Fig. 1a).

85 For imaging, the dissected retina was placed inside a chamber with RGC side facing down.  
86 The excitation light-sheet was directed parallel to the plane of the retina containing the GCaMP  
87 expressing cells. Images were acquired at 10-50 Hz, with a field of view of 700 - 1500  $\mu\text{m}$  along  
88 each dimension. Spatial binning was used to improve the signal to noise ratio of the acquired  
89 images. An operating laser diode power of 0.1-15 mW, corresponding to 0.01-1.5 mW power at  
90 the sample, was found to be adequate for detecting spontaneous and stimulus evoked activity in  
91 RGCs.

92 The visual stimulus for targeting photoreceptors was displayed by a digital light projector  
93 (DLP) with a 385 nm LED. The stimulus was delivered to the retina through the objective used for  
94 imaging fluorescent emission. To focus the stimulus on the photoreceptor plane without changing  
95 the plane of imaging, the position of the DLP relative to the microscope tube lens was adjusted

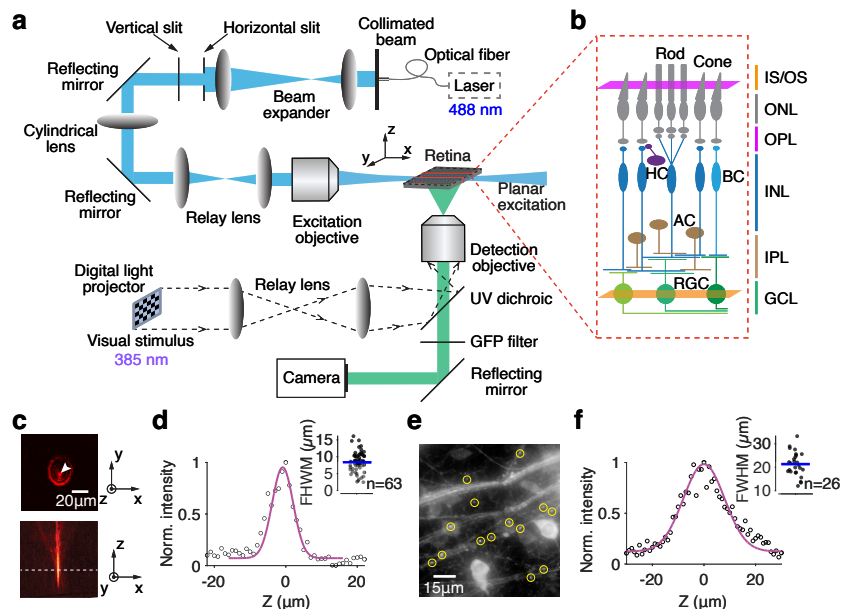

**Figure 1: Design and characterization of a 1-photon light-sheet microscope for *ex vivo* retinal imaging.** (a) Optical arrangement producing a Gaussian beam light-sheet from a 488 nm continuous wave laser source. The light-sheet is coplanar with the retinal imaging plane. The visual stimulus is projected onto the photoreceptors through a detection objective. A high-speed CMOS camera captured the fluorescence images. (b) Schematized retinal circuit with stimulus plane (magenta) and imaging plane (orange). IS/OS: inner segment/outer segment of photoreceptors, ONL: outer nuclear layer, OPL: outer plexiform layer, INL: inner nuclear layer, IPL: inner plexiform layer, GCL: ganglion cell layer, HC: horizontal cell, BC: bipolar cell, AC: amacrine cell, RGC: retinal ganglion cell. (c) Light-sheet imaging of fluorescent microspheres (500 nm diameter) using a 20x objective. Top: lateral image, bottom: axial image. (d) Axial intensity profile of an imaged microsphere. Magenta curve: Gaussian fit. Inset: full-width half max (FWHM) of Gaussian fits for  $n=63$  microspheres. Depth of field =  $8.5 \pm 2.8 \mu\text{m}$ . (e) GCaMP6f expression in varicosities (yellow circles) along RGC axons. (f) Axial intensity profile of a representative varicosite (magenta curve) and depth of field,  $22.2 \pm 8.1 \mu\text{m}$ , estimated from  $n=26$  varicosities.

96 (Fig. 1a, see also Methods). This allowed moving the visual stimulus focal plane by  $\sim 250 \mu\text{m}$ ,  
 97 sufficient to span the entire thickness of the mouse retina<sup>14</sup> (Fig. 1b).

98

### 99 *Axial spread of light-sheet from scattering*

100 A key aspect that controls the quality of images of biological tissues is scattering. The more  
 101 the excitation light is scattered, the higher the background illumination and the worse the image  
 102 quality. In 1-photon light-sheet imaging, scattering of excitation light can increase the effective  
 103 thickness of the light-sheet and thus reduce the resolution and image contrast<sup>15</sup>.

104 To determine the impact of scattering on the thickness of the light-sheet, we first measured  
 105 the true thickness. This was achieved by imaging 500 nm fluorescent beads embedded in agarose<sup>16</sup>  
 106 (Fig. 1c). Agarose has a scattering coefficient of  $\sim 1 \text{ cm}^{-1}$ <sup>17</sup>, and therefore minimally scatters light.  
 107 The depth of field estimated by fitting the measured axial intensity profile of individual beads with

108 a Gaussian function was  $8.5 \pm 2.8 \mu\text{m}$  (Fig. 1d). Next, we modeled the Airy disk profile as a  
109 Gaussian with standard deviation equal to the theoretical depth of field, and then deconvolved it  
110 from the measured intensity profile to obtain the true thickness of the light-sheet. With a theoretical  
111 depth of field  $3.48 \mu\text{m}$  (Eq. 5 in Methods), the true thickness of the light-sheet was  $7.75 \mu\text{m}$ .

112 The retina has a scattering coefficient of  $56.8 \text{ cm}^{-1}$ <sup>18</sup>, meaning that it scatters 1-photon  
113 excitation light more than agarose. To determine the true thickness of the 488 nm light-sheet in  
114 the retina, we imaged individual axon varicosities of RGCs (Fig. 1e). The varicosities are  $\sim 1\text{-}4$   
115  $\mu\text{m}$ <sup>19</sup> and exhibit robust calcium fluorescence from action potential induced calcium influx<sup>20</sup>, thus  
116 acting as proxies for fluorescent beads. With a measured depth of field  $\sim 22.2 \pm 8.1 \mu\text{m}$ , averaged  
117 over  $n=26$  varicosities (Fig. 1f), and using the above deconvolution procedure, the true thickness  
118 of the light-sheet was obtained as  $21.72 \mu\text{m}$ . This indicates that the light-sheet, when directed at  
119 the ganglion cell layer, and/or the inner plexiform layer, remains well-confined to these laminae<sup>14</sup>  
120 and does not strongly intersect with the photoreceptor layer.

121  
122 *Targeting S-cones for visual stimulation*

123 A challenge with fluorescence imaging in the retina is that photoreceptors are exquisitely  
124 light sensitive, and therefore can be activated by even a small amount of scattered light. The  
125 excitation will depend on the overlap between the opsin action spectrum and the excitation  
126 wavelength. To overcome this challenge, we targeted our experiments to the ventral mouse retina  
127 because the cones in this region predominantly express a short-wavelength sensitive S-opsin that  
128 is maximally sensitive to 360 nm (Fig 2b, c)<sup>9,21</sup>. Light sensitivity of this S-opsin at the fluorescent  
129 excitation wavelength of 488 nm is  $\sim 4$  orders of magnitude lower than its peak sensitivity. This  
130 further reduced the effect of light-sheet scatter on cone photoreceptor excitation. Calibration  
131 experiments indicated that the rate of S-opsin activations from the scattered light sheet was  $\sim 10^2$   
132 photoisomerizations( $P^*$ )/cone/s (Supplementary Fig. 1). By comparison, the visual stimulus  
133 focused onto the cones was delivered at an intensity equivalent to  $\sim 10^5 P^*/\text{cone/s}$ , at 385 nm, near  
134 the peak S-opsin sensitivity<sup>9,21</sup>. Thus, the scattered light was  $\sim 0.1\%$  of the mean visual stimulus,  
135 below the contrast detection sensitivity of cones<sup>22</sup>.

136

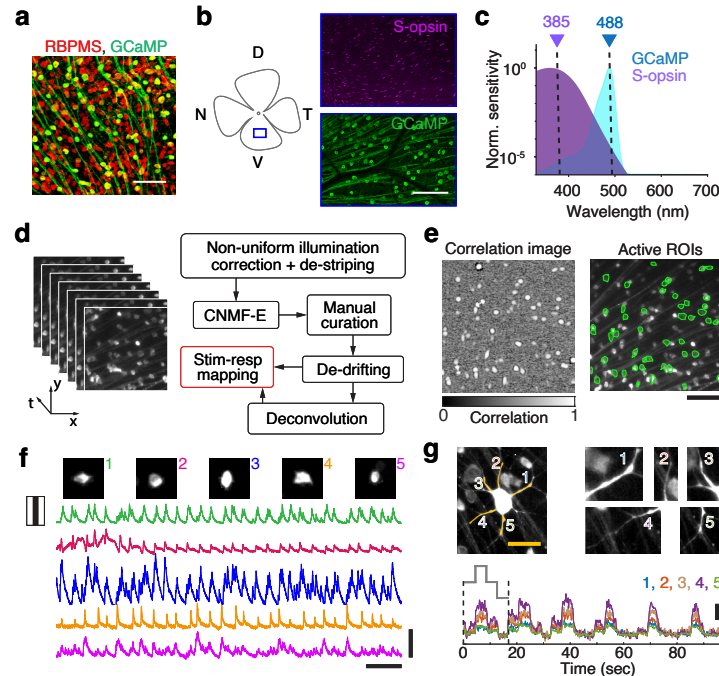

**Figure 2: Imaging calcium responses of RGCs.** (a) RGCs in retina from Ai148;PVCre mouse immunolabeled with pan-RGC marker RBPMS (red), and with GFP (green: GCaMP6f). Scale bar: 50  $\mu\text{m}$ . (b) Left: Ventral retina used for fluorescence imaging. Right: Immunolabeling for S-opsin in cone photoreceptors (magenta) and GFP (green: GCaMP6f). Scale bar: 100  $\mu\text{m}$ . (c) Visual stimuli delivered at 385 nm (purple arrow) near the peak spectral sensitivity of S-opsin (purple shaded area). Laser excitation at 488 nm (blue arrow) matched to the peak excitation of GCaMP (blue shaded area). (d) Image analysis pipeline for extracting spontaneous or visual stimulus evoked calcium responses and inferred spikes of RGCs. (e) Left: Spatiotemporal response correlation image. Gray bar: Correlation coefficient. Right: Outlines (green contours) of active RGCs. Scale bar: 100  $\mu\text{m}$ . (f) Fluorescent images of representative RGC somata (top) and their temporal responses (bottom) to moving bars. Vertical scale bar: 20 (units of SNR, 6dB cutoff). Horizontal scale bar: 200 s. (g) Calcium activity in dendrites of a representative RGC to repeated full field light steps (gray trace, bottom). Horizontal scale bar: 20  $\mu\text{m}$ . Dashed vertical lines indicate duration of a single trial; total n=6 trials. Temporal traces for 5 dendrites (top right) are shown in color. Vertical scale bar: 2 (units of SNR, 6dB cutoff).

### 137 *Calcium fluorescence signals in active RGCs*

138 To image calcium activity in RGCs, we used ventral retinas from Ai148;PVCre mice (Fig.  
 139 2b)<sup>23,24</sup>. Robust GCaMP6f fluorescence was observed in the somata, axons and dendrites of RGCs  
 140 (Fig. 2d-g). To extract and analyze the changes in calcium-dependent fluorescence resulting from  
 141 visual stimulation of the photoreceptors, fluorescence images were first denoised, corrected for  
 142 non-uniform illumination, and then processed using a semi-automated algorithm<sup>25</sup> (see Methods,  
 143 Fig. 2d). Specifically, a threshold signal to noise ratio<sup>25</sup> of 8 and a pixel intensity correlation of 0.8  
 144 were used to detect and process the signals from fluorescent somata. In a typical experiment, this  
 145 yielded several hundred active RGCs in the field of view (Fig. 3a). We were also able to measure  
 146 spontaneous and stimulus driven calcium responses from primary and secondary dendrites of

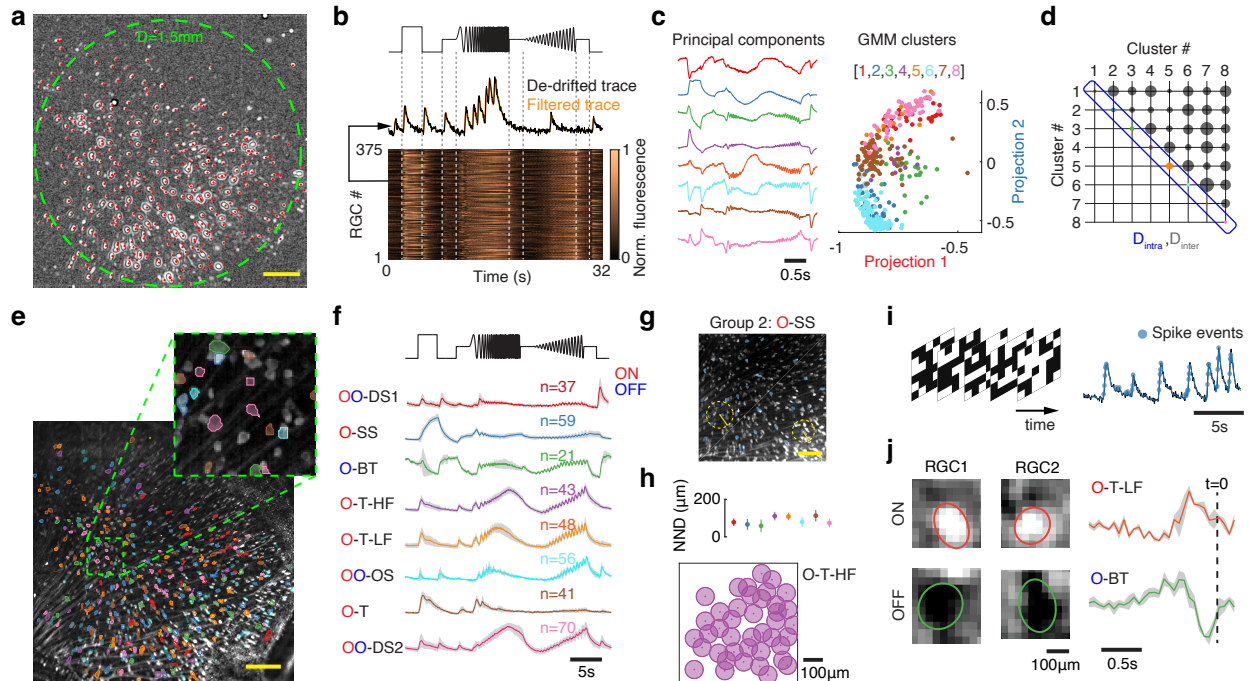

**Figure 3: Classification of RGCs from population calcium responses.** (a) Response correlation image over imaging field of view. Red filled circles: Active RGCs,  $n=375$ . Green dashed circle: 1.5 mm diameter. Scale bar:  $200 \mu\text{m}$ . (b) Top: Chirp stimulus trace (black). Middle: Baseline corrected (black) and filtered (orange) temporal response of a representative RGC. Bottom: Heatmap of temporal fluorescent traces of  $n=375$  RGCs. (c) Left: 8 leading principal components of the normalized temporal responses in (b). Right: Gaussian mixture model (GMM) fit to projection values in 8-D hyperspace shown in a 2-D plane. Clustered projection values ( $n=8$  clusters) are shown by colored circles. (d) Mean pairwise Euclidean distance between projection values within each cluster ( $D_{\text{intra}}$ ) and between clusters ( $D_{\text{inter}}$ ) are illustrated by circles along the diagonal and the off-diagonal respectively. The radius of each circle represents the Euclidean distance. Color scheme for diagonal elements is same as in (c). (e) Median intensity projection image with overlaid patches showing soma locations of active RGCs. Patch color corresponds to the clusters in (c). Scale bar:  $200 \mu\text{m}$ . Inset: Magnified view of an image patch. (f) Mean temporal responses of RGCs from different clusters to the chirp stimulus (top trace, black). ON: O (red), OFF: O (blue); DS: direction selective; SS: slow sustained; BT: brisk transient; T-HF: transient high frequency; T-LF: transient low frequency; OS: orientation selective; T: transient. Shaded error bar: SD. (g) Image showing RGC locations (blue patches) from representative group 2. Dashed circle and box (yellow) depict nearest neighbor RGCs. Scale bar:  $100 \mu\text{m}$ . (h) Top: Median (filled circle) and MAD (error bar) of nearest neighbor distances (NND) for each group in (f). Bottom: Representative mosaic of O-T-HF RGCs, based on median NND (radius of circle). (i) Checkerboard pattern stimulus (checker size  $\sim 40 \mu\text{m}$ ), corresponding response trace of a representative RGC (black) and inferred spikes (light blue circles). (j) Spatial RFs of representative RGCs (left) and mean temporal RFs across all cells (right) belonging to ON transient low frequency and OFF brisk transient types. Time of spike:  $t=0$ . Shaded error bar: SD.

147 individual RGCs (Fig. 2g). These data confirmed the system's capability for imaging large-scale  
 148 neural activity in the retina.

149

150 *Response classification of RGCs using full-field chirp and checkerboard noise stimuli*

151 To validate measurement quality in RGC somata, we tested the reliability of functionally

152 classifying RGCs based on the changes in fluorescence produced by visual stimuli. Previous  
153 studies show that parvalbumin is expressed in 8 morphologically distinct RGC types<sup>11,12</sup>,  
154 suggesting an equivalent number of functionally distinct RGC types. To classify the RGCs, we  
155 presented a ‘chirp’ visual stimulus<sup>1</sup> (Fig. 3b). This stimulus consists of a full-field light step,  
156 followed by full-field frequency and amplitude modulated sinusoidal illumination. Calcium-  
157 dependent fluorescence changes in 375 RGCs (n=1 retina) were acquired over a field of view ~2.25  
158 mm<sup>2</sup> (Fig. 3a, b). Singular value decomposition (SVD) was applied to the temporal fluorescence  
159 traces and leading principal components were used to generate a projection hyperspace (Fig. 3c,  
160 left; also see Methods). Fitting a Gaussian mixture model to the projection space yielded 8 clusters  
161 (Fig. 3c, right). The discriminability of the clusters was assessed by comparing the inter-cluster  
162 Euclidean distance with intra-cluster Euclidean distance (Fig. 3d). Accuracy of clustering was  
163 determined by cross-validating clusters from alternative clustering methods such as Hierarchical  
164 agglomerative clustering (HAC)<sup>26</sup> and Spectral clustering (SC)<sup>27</sup>. Each clustering algorithm  
165 produced the same results (Supplementary Fig. 2).

166 Based on the temporal response properties to different phases of the chirp stimulus, each  
167 cluster of RGCs was further assigned to distinct functional types: ON, OFF, ON-OFF, transient  
168 and sustained (Fig. 3e, f). The RGCs in each cluster also exhibited a mosaic-like regularity in their  
169 spatial arrangement<sup>28</sup>, with nearest neighbor spacing ranging from 70 to 120  $\mu\text{m}$  for different types  
170 (Fig. 3g, h). This suggests that each cluster represents a functionally distinct RGC type<sup>29-31</sup>.

171 To examine the contrast polarity and temporal integration properties of RGCs, we  
172 characterized the spatiotemporal receptive fields (RFs) of RGCs from their changes in  
173 fluorescence during the presentation of checkerboard noise. Spike trains were estimated from  
174 calcium signals, and calcium transients associated with at least 1 spike were used to estimate the  
175 RF (see Methods, Fig. 3i). RGCs classified as ON brisk transient and OFF brisk transient types  
176 from responses to the chirp stimulus exhibited ON- and OFF-center responses, respectively (Fig.  
177 3j). The temporal responses exhibited positive and negative contrast preferences immediately  
178 preceding putative spikes (estimated from the calcium signals), with a biphasic profile consistent  
179 with previous findings for these RGC types<sup>28,32</sup>.

180

### 181 *Direction and orientation selective responses of RGCs*

182 To identify direction selective (DS-) RGCs, we imaged calcium responses of RGCs from



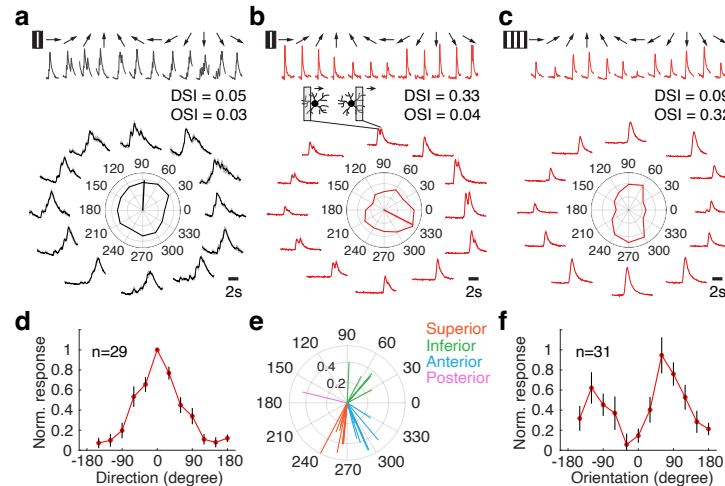

**Figure 4: Direction and orientation selective responses of RGCs.** (a) Response of a non-DS RGC. Top: A bright bar moving on a dark background along 12 directions. Bottom: Trial averaged calcium responses to different directions of bar movement. Gray shaded error bar is SD. The polar plot in the center shows normalized response and preferred direction of the RGC. DSI: Direction Selective Index; OSI: Orientation Selective Index. (b) Same as in (a), for an ON-OFF DS-RGC. Inset illustrates ON and OFF responses elicited by a bright bar entering and exiting the receptive field of the RGC. (c) Same as in (a), for an OS-RGC. (d) Mean tuning curve of DS-RGC population (n=29 RGCs). Black error bar is SD. (e) Preferred directions of ON-OFF DS-RGC subtypes (n=21 RGCs). (f) Mean tuning curve of OS-RGC population (n=31 RGCs). Black error bar is SD.

183 the same retina as in Figure 3, to bright bars (100% contrast) moving along 12 different directions.  
 184 We calculated a direction selective index (DSI) using the area under the temporal fluorescence  
 185 trace for different movement directions (see Methods). RGCs with DSI greater than 0.3 were  
 186 classified as DS-RGCs<sup>33,34</sup> (Fig. 4a, b, d). Prolonged exposure to excitation light can bleach  
 187 GCaMP, thereby reducing its sensitivity over time<sup>6</sup>. This can bias DSI estimates obtained from  
 188 trial averaged responses. Therefore, only trial blocks in which the DSI did not change by more  
 189 than 20% of that estimated from the first trial, were included in the analysis. A total of 29 RGCs  
 190 were identified as direction selective (Fig. 4d), out of which 21 had clear ON and OFF responses  
 191 (Fig. 4b inset). The ON-OFF DS-RGCs were further classified into 4 subtypes<sup>35</sup> based on  
 192 orthogonality of preferred directions (Fig. 4e). A similar fraction of DS-RGCs (~10%) were  
 193 estimated from retinas of other Ai148;PVCre mice (n=4).

194 To identify orientation selective (OS-) RGCs, we measured calcium responses to drifting  
 195 gratings presented at different orientations (Fig. 4c). Orientation selectivity was quantified by an  
 196 orientation selective index (OSI) (see Methods). To distinguish OS-RGCs from DS-RGCs, we  
 197 calculated the DSI of OS-RGCs from their responses to moving bars. A total of 31 RGCs which

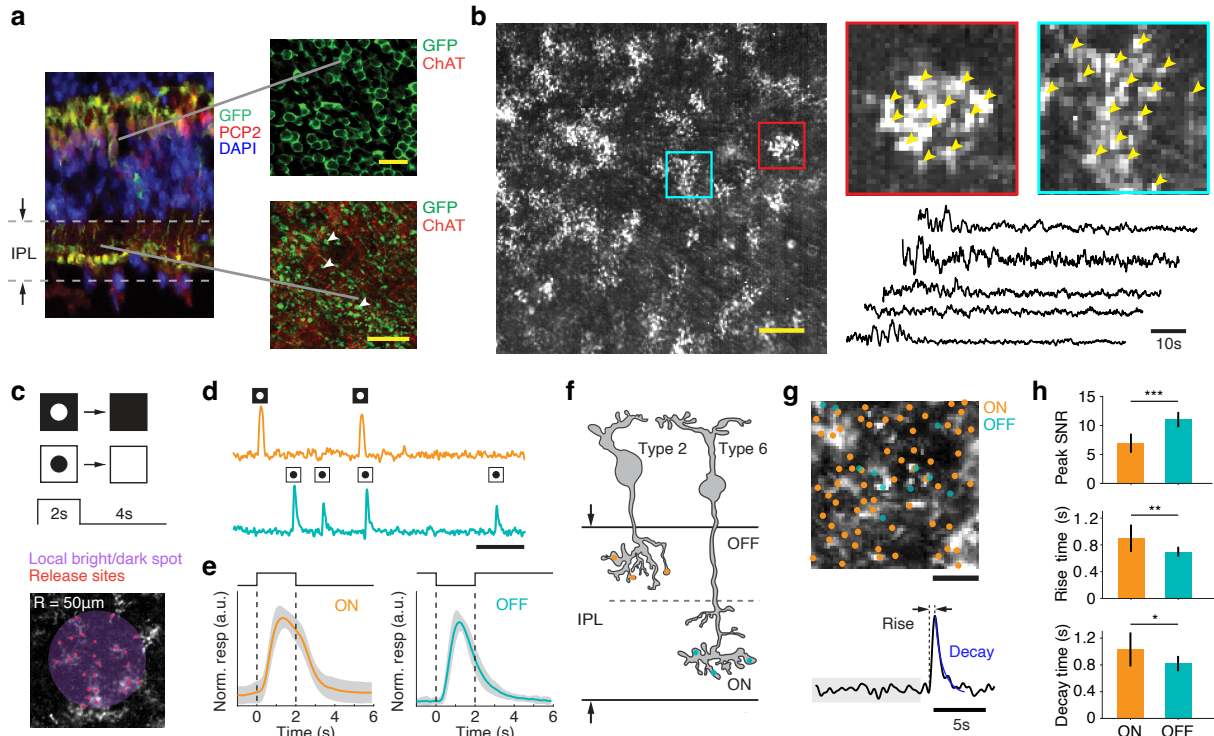

**Figure 5: Calcium imaging of BC axon terminals.** (a) Left: Colocalization of GFP (green) and PCP2 (red) showing soma and terminals of BCs in the retina of an Ai148;PCP2Cre mouse. DAPI: blue. Right: Flat-mount view of somata (top) and axon terminals (bottom). Scale bar: 20  $\mu\text{m}$ . (b) Left: SD projection image showing active release sites. Scale bar: 100  $\mu\text{m}$ . Right: Magnified view of regions indicated in red and cyan with spatial footprints (yellow arrows). Spontaneous responses (black traces) of 5 randomly selected release sites. (c) Top: 100  $\mu\text{m}$  diameter spots at 100% positive and negative contrasts, are presented for 2 s at  $n=34$  locations. Bottom: Representative spot (shaded circle) and active sites (red dots). (d) Representative temporal fluorescent responses of a release site stimulated by a bright spot (top, orange), and a dark spot with 50  $\mu\text{M}$  L-AP4 (bottom, teal), appearing at these locations at random times ( $n=5$  repeats for each location). Scale bar: 20 s. (e) Normalized calcium transients to bright (left) and dark (right) spots respectively, averaged over  $n=504$  (ON, orange) and  $n=156$  (OFF, teal) release sites. Dashed vertical lines indicate duration of the spot. Solid curve: mean. Shaded error bar: SD. (f) Schematized structure of a type 2 and a type 6 BC, and their axonal arbors in the inner plexiform layer (IPL). Orange and teal filled circles represent putative release sites in the OFF and the ON layers respectively. (g) Top: Release site locations on the SD projection image. Scale bar: 20  $\mu\text{m}$ . Bottom: Representative trace (black) of calcium transient used for estimating rise time, baseline fluctuations (gray) and time of decay (blue). (h) Ratio of peak value of calcium transient to the SD of baseline response (top), rise time (middle) and decay time constant from exponential fit (bottom), for ON ( $n=504$ , orange) and OFF ( $n=156$ , teal) release sites. Mean, SD and  $P$ -values with Bonferroni correction are:  $6.92 \pm 1.72$  (ON),  $13.15 \pm 1.52$  (OFF),  $P = 3.9 \times 10^{-7}$  (top);  $0.93 \pm 0.22$  (ON),  $0.71 \pm 0.10$  (OFF),  $5.21 \times 10^{-3}$  (middle); and  $1.03 \pm 0.25$  (ON),  $0.82 \pm 0.11$  (OFF),  $3.1 \times 10^{-2}$  (bottom). All OFF-responses in (d), (e), (g) and (h) were obtained with L-AP4.

198 had OSI>0.3 and DSI<0.3, were classified as orientation selective (Fig. 4f). Note, it is possible  
 199 some of these RGCs are bi-direction selective and not OS per se. However, OS cells have been  
 200 described previously in the retina, while bi-direction selective cells have not.

201

## 202 *Calcium imaging at bipolar cell axon terminals*

203 Finally, we tested whether the system's resolution allows for imaging calcium activity at  
204 synaptic release sites. For this, we used retinas from Ai148;PCP2Cre transgenic mice<sup>13</sup> that are  
205 known to express GCaMP6f primarily in type 6, type 2 and rod BCs<sup>36,37</sup>. Depolarization of BCs  
206 and subsequent glutamate release are associated with increased calcium influx at the axon terminal  
207 release sites<sup>20</sup>, making them ideal for imaging. Light-sheet excitation was targeted to the inner  
208 portion of the inner plexiform layer adjacent to the ganglion cell layer. Robust GCaMP6f  
209 expression was observed in the puncta, each ~1-4  $\mu\text{m}$ , clustered across the imaging field, consistent  
210 with the size and density of release sites at BC terminals (Fig. 5a, b).

211 In the absence of visual stimuli, the calcium fluorescence was relatively weak across the  
212 different release sites (Fig. 5b). To visually stimulate the BCs (via the photoreceptors), bright and  
213 dark spots were presented at different locations (Fig. 5c; see also Methods). A bright spot on a  
214 dark background induced strong calcium fluorescence transients across hundreds of release sites  
215 within a 730  $\mu\text{m} \times 730 \mu\text{m}$  field of view (Fig. b, d). Following disappearance of the spot, the  
216 fluorescence rapidly decayed to the baseline, indicating that these responses are likely produced  
217 by type-6 ON BCs (Fig. 5e, f). The release sites that exhibited a transient increase in calcium  
218 fluorescence in response to a dark spot on a bright background were sparser and had smaller  
219 response amplitudes compared to the ON release sites. Therefore, to unmask these responses, we  
220 blocked the ON pathway using L-AP4 – an mGluR6 agonist<sup>38</sup>. This significantly improved the  
221 signal to noise ratio (SNR) of the imaged responses, allowing unambiguous identification of these  
222 release sites (Fig. 5d, e, f). The responses rose and decayed sharply to the appearance and  
223 disappearance of the dark spot (Fig. 5d, e). In addition, moving the excitation and the imaging  
224 plane up toward the photoreceptors by ~10  $\mu\text{m}$  improved the SNR of these release sites by ~20%,  
225 indicating these responses were from type-2 OFF BCs (Fig. 5f). The temporal resolution and the  
226 SNR were sufficient for revealing the faster kinetics of the OFF responses in the outer layers of  
227 the IPL relative to the ON responses in the inner layers of the IPL (Fig. 5h), in agreement with  
228 previous studies<sup>37,39</sup>

## 230 **Discussion**

231 We present a 1-photon light-sheet imaging system, that allows measurements of neural  
232 activity across large populations of retinal neurons at synaptic resolution, while simultaneously

233 presenting visual stimuli to photoreceptors. The widefield planar sheet of light is confined to a  
234 layer  $\sim 20 \mu\text{m}$  thick, which allows for imaging calcium activity in large cohorts of neurons confined  
235 to specific layers in the retina. An axial separation is maintained between the excitation plane for  
236 fluorescence imaging and the focal plane for visual stimulation of the photoreceptors. Using this  
237 system, we were able to measure spontaneous and visual stimulus dependent responses of  
238 hundreds of RGCs routinely over a retinal area  $1.5\text{-}2.25 \text{ mm}^2$ , corresponding to  $50\text{-}80$  degrees of  
239 visual angle in the mouse retina (Fig. 3a). The signal to noise ratio of the measured activity was  
240 sufficient to functionally classify RGCs in Ai148;PVCre retinas into 8 distinct types, consistent  
241 with previous morphological classification<sup>11,12</sup>. The resolution of the system also allowed  
242 measurements of calcium activity in individual synaptic release sites at BC axon terminals from  
243 Ai148;PCP2Cre retinas. We could distinguish the release sites associated with ON and OFF type  
244 BCs consistent with previous studies<sup>13</sup>.

245 Optical imaging techniques that allow monitoring ensemble activity of neurons within  
246 biological specimens, can offer new insights into how sensory signals are processed within  
247 specialized neural circuits. For example, 2-photon calcium fluorescence imaging<sup>1,4,35</sup> has been  
248 widely used in both retinal and cortical research for several reasons: 1) It provides high spatial  
249 resolution; 2) infrared light scatters less than shorter wavelength light, which facilitates imaging  
250 deep inside the tissue; and 3) infrared light reduces the activation of photoreceptors when imaging  
251 retinal neurons. However, this approach requires a costly and complex pulsed femtosecond laser  
252 setup and provides data with either poor temporal resolution or limited scan areas due to point  
253 laser scanning.

254 Light-sheet fluorescence microscopy is an alternative imaging modality that utilizes planar  
255 illumination to optically section the sample, enabling rapid acquisition of images with high spatial  
256 resolution while minimizing photobleaching of the fluorescence indicator<sup>40</sup>. These advantages  
257 have led to an increased adoption of this technology for biomedical imaging, ranging from cultured  
258 tissues to *in vivo* imaging in small animals such as zebrafish and drosophila<sup>41</sup>. In particular,  
259 combining optical sectioning with synchronized delivery of excitation light<sup>42</sup>, allows capturing of  
260 subcellular dynamics in living cells as well as 3-D reconstruction of activity in living biological  
261 specimens<sup>43</sup>. However, constraints in delivering the planar excitation light orthogonal to the  
262 detection axis often require the sample to be embedded in agarose – a condition not ideal for *ex*

263 *vivo* retina. This requires custom-designed systems that can accommodate the geometry of the  
264 sample for mounting and keep the sample viable for long-term imaging.

265 Light-sheet imaging allows robust measurements of calcium responses with high spatial  
266 resolution in *ex vivo* retina, and therefore offers several benefits. First, the ability to monitor neural  
267 activity at the resolution of single synapses across a large area will open the possibility of  
268 examining how excitatory and inhibitory synaptic inputs from genetically targeted interneurons  
269 are integrated over dendritic sub-compartments. This can offer new insights into circuit-specific  
270 computations<sup>44</sup>. Second, measurements of activity simultaneously in multiple genetically targeted  
271 cell types, combined with pharmacological or optogenetic manipulations<sup>45</sup>, can help distinguish  
272 the role of different presynaptic cell types in shaping the gain and nonlinearities of signal transfer.  
273 Third, measurements of large-scale neural activity in specific layers will enable characterization  
274 of how signal and noise correlations<sup>46</sup> impact the encoding and transmission of information about  
275 visual features by different populations of neurons.

276 A challenge in retinal fluorescence imaging using 1-photon light-sheet is scattering of the  
277 excitation light. The 488 nm light scattered within the retina can potentially reach the  
278 photoreceptors and active the M-opsins in cone photoreceptors. Another challenge is  
279 contamination of fluorescence signals from neurites and other structures such as axon bundles  
280 expressing GCaMP (Fig. 3e). But, with the development of faster, brighter and long-wavelength  
281 sensitive indicators<sup>7,47</sup>, as well as soma and dendrite directed calcium indicators<sup>48</sup>, these challenges  
282 can be substantially mitigated. The architecture of 2-photon light-sheet imaging with the use of  
283 infrared lasers<sup>43</sup> can be integrated into our framework to overcome limitations in spatial resolution.  
284 Our system also allows for multiplexing excitation light of different wavelengths that can be  
285 targeted to different retinal planes, and incorporating remote focusing and a tunable lens<sup>49</sup> to  
286 perform rapid multi-plane imaging in the retina. Given the versatility, flexibility and high-  
287 throughput measurement capabilities of our imaging platform, we envision this system to become  
288 a powerful tool for large-scale interrogation of functional connectivity between cell types in the  
289 retina.

290

291

292

293

## 294 **Methods**

### 295 *Animal and retina preparation*

296         Procedures for animal care and use followed guidelines approved by the Institutional  
297 Animal Care and Use Committee at Duke University. The Ai148 floxed mice carrying the  
298 GCaMP6f transgene under the control of tetracycline transactivator tTA2 (TIT2L-GC6f-ICL-  
299 tTA2) (Jackson Laboratory, 030328), were crossed to (1) PVCre mice carrying a Cre allele in  
300 parvalbumin (PV) expressing neurons (Jackson Laboratory, 008069), and (2) PCP2Cre mice  
301 carrying Cre allele in Purkinje cell protein (PCP2) expressing neurons (Jackson Laboratory,  
302 010536), to obtain the Ai148;PVCre and Ai148;PCP2Cre mice respectively. Mice (n=10  
303 Ai148;PVCre and n=6 Ai148;PCP2Cre) with age between 2-10 months of both sexes were used  
304 for experiments. Retinas for experiments were obtained following previously established  
305 protocols<sup>50</sup>. Briefly, mice were kept under 12 hr light-dark cycle with *ad lib* access to food and  
306 water. For experiments, animals were dark-adapted for 12 hrs, then euthanized in complete  
307 darkness and under infrared illumination using infrared goggles. The eyes were enucleated, and  
308 retinas were dissected out in a petri dish containing sodium bicarbonate buffered Ames' media  
309 (Sigma Aldrich, A1420) bubbled with 95% oxygen and 5% carbon dioxide (pH 7.4, temperature  
310 maintained at 33°C). A piece of retina ~1.5 mm × 2 mm was cut from the ventral half and  
311 transferred to a custom-designed chamber containing oxygenated Ames' solution. The chamber  
312 has a glass bottom for imaging and a glass side window for entry of light-sheet excitation. The  
313 retina was flattened gently using a hollow cylinder with a porous membrane (Spectra/Por RC  
314 dialysis membrane, 132677) that allows passage of solution and metabolites. The chamber  
315 containing the retina was transferred to the light-sheet microscope for imaging. Throughout the  
316 experiment, the retina was continuously superfused with oxygenated Ames' solution (described  
317 above) with a gravity-fed perfusion system.

318

### 319 *Light sheet excitation*

320         The excitation light was provided by a 488 nm laser (OBIS LX continuous wave laser,  
321 Coherent, Inc.). The laser beam was collimated using a fiber collimator (Thorlabs, Inc., F240APC-  
322 A) and expanded to 1 mm diameter by a pair of relay lenses with effective focal length 225 mm  
323 (Edmunds Optics, Inc., 47-365, 47-645). The expanded Gaussian beam is compressed by a  
324 cylindrical lens with focal length 50 mm (Edmund Optics, Inc., 33-228) and the resulting light-

325 sheet is focused on the back aperture of the illumination objective (Mitutoyo, 5x, 0.14 NA, MY5X-  
326 802) by a pair of relay lenses of effective focal length 50 mm (Thorlabs, Inc., LBF254-050). A  
327 pair of orthogonal slits (Thorlabs, Inc., CP-20S, VA100C) controlled the lateral extent and the  
328 axial thickness of the light-sheet. The laser operating power was maintained between 0.1-15 mW,  
329 that produced 0.01-1.5 mW power at the sample. The depth of field was estimated by obtaining a  
330 stack of 200 images in 1  $\mu\text{m}$  steps, of 500 nm diameter fluorescent polystyrene beads (Spherotech,  
331 Inc., FICP-08-2) embedded in agarose placed inside a quartz cuvette (Thorlabs, Inc., CV10Q35F).

332

### 333 *Visual stimulation and calcium imaging*

334 Visual stimuli were rendered using an OpenGL framework using custom written scripts in  
335 MATLAB (The Mathworks, Inc., Natick, MA). The stimulus patterns were streamed via an HDMI  
336 cable to the LightCrafter 4500 Digital Light Projector (DLP) (EKB Technologies, Ltd., DPM-  
337 E4500LUVBGMKII) and controlled by a custom GUI. The stimulus was displayed at 385 nm  
338 using a built-in LED, operated in the linear range. The display comprised of digital micromirrors  
339 arranged in a diamond pattern, with spatial resolution of  $920 \times 1040$  pixels. To minimize spherical  
340 aberration of the projected stimulus image, a circular aperture (Thorlabs, Inc., SM1D12D) was  
341 placed in front of the DLP. The visual stimulus was collimated by a 100 mm aspheric converging  
342 lens (Thorlabs, Inc., AL50100) and the tube lens of Ti microscope (Nikon Instruments, Inc.). The  
343 final image was focused on the photoreceptors by a 10x Plan Fluor (Nikon Instruments Inc.,  
344 MRH00101) or a 20x Super Plan Fluor (Nikon Instruments Inc., MRH08230) objective, rated to  
345 operate in the UV wavelength range, through the bottom glass surface of the chamber. The  
346 stimulus plane was offset from the imaging plane by controlling the distance between the DLP and  
347 the focusing lens (Fig. 1a). This offset allowed us to simultaneously use the same objective for  
348 visual stimulus delivery, and imaging calcium dependent fluorescence in RGCs and BCs. The  
349 following set of stimuli were used in our experiments: (1) bright bar (100% Michelson contrast)  
350 traveling along 12 different directions with a speed of 480 m/s, (2) grating (100% Michelson  
351 contrast) moving along 12 different directions with a speed ranging between 24-100 m/s, (3) full-  
352 field ‘chirp’ sequence comprising of dark (3 s), bright (3 s), contrast frequency modulation (0.5 -  
353 8 Hz, 8 s period) and contrast amplitude modulation (0.5 - 2 Hz, 8 s period), repeated 7 times, (4)  
354 full-field light increment and decrements, (5) binary checkerboard patterns with checker size 10 -  
355 50  $\mu\text{m}$ , and (6) local bright/dark spots (100  $\mu\text{m}$  diameter) repeated 5 times at each location

356 manually selected from a template image. L-AP4 (L-(+)-2-Amino-4-phosphonobutyric acid,  
357 Tocris Bioscience, 0103) at 50  $\mu\text{M}$  was used to block mGluR6 receptors. The stimulus frames  
358 refreshed at 60 Hz. The stimulus brightness was calibrated using a photometer (Thorlabs, Inc.,  
359 PM100D) and was set to  $\sim 10^5$  P\*/S-cone/s for experiments using neutral density filters (Thorlabs,  
360 Inc.).

361 Calcium images were captured by an ORCA Fusion camera (Hamamatsu Photonics) using  
362 the HC-Image software (Hamamatsu Photonics). GCaMP6f expression in RGC somas and BC  
363 terminals was reliably observed over a laminar depth of 20-30  $\mu\text{m}$ . A long-pass dichroic mirror  
364 (Thorlabs, Inc., DMLP425R) was used to reflect the UV stimulus and transmit the GCaMP6f  
365 emission. A long-wave-pass edge filter (Semrock, FF01-430/LP-25) and a GFP filter (Semrock,  
366 GFP-3035D) were placed after the dichroic to block UV light and allow emitted light, respectively,  
367 to reach the camera. Images are acquired at 10-50 Hz, at 16-bit resolution, with spatial binning of  
368 2 or 4. Pixel size of projected image was calibrated for each imaging objective using a glass reticle  
369 with 10  $\mu\text{m}$  resolution. Calcium images were registered with visual stimuli by using timestamps  
370 from the camera and stored in the stimulus computer via a 6550-USB DAQ device (National  
371 Instruments, Corp.).

372

### 373 *Theoretical thickness of light-sheet*

374 The thickness of the light-sheet determines the axial range over which the sample can be  
375 reliably imaged. The light-sheet produced by the excitation optics (Fig. 1a) has a Gaussian profile  
376 with a beam waist:

$$377 \quad w = \frac{2\lambda_{exc}}{\pi NA} \quad (1)$$

378 Here,  $\lambda_{exc}$  is the wavelength of excitation light and  $NA$  is the numerical aperture of the illumination  
379 objective. If  $\theta$  is the half angle of the light cone generated by the objective and  $n$  is the refractive  
380 index of the medium between the sample and the objective, then Eq. 1 can be reformulated as:

$$381 \quad w = \frac{2\lambda_{exc}}{\pi (n \cdot \sin(\theta))} = \frac{2\lambda_{exc}}{\pi (n \cdot (\text{height of incident beam}/\text{focal length}))} \quad (2)$$

382 Given a 488 nm excitation wavelength, a  $\sim 1$  mm diameter beam, a 40 mm focal length illumination  
383 objective, and 1.33 refractive index of water, the beam waist is,

$$384 \quad w = \frac{2 \cdot 0.488}{\pi (1.33 \cdot 1.0/40)} = 9.322 \mu\text{m} \quad (3)$$

385



386 *Axial resolution and depth of field*

387 The axial resolution of a microscope depends on the optical properties of the detection  
388 system and the refractive index of the sample. Considering the elongated shape of the intensity  
389 profile along the axial direction<sup>51</sup>, the theoretical axial resolution is the distance between the central  
390 maximum to the first minimum along the Z-axis:

391 
$$z_{axial(th)} = \frac{2n\lambda}{NA^2} \quad (4)$$

392 where  $n$  is the refractive index of the sample,  $\lambda$  is the wavelength of the emitted light and  $NA$  is  
393 the numerical aperture of the imaging objective. With 510 nm peak emission wavelength of  
394 GCaMP6f,  $n=1.38$  for retina and 0.45  $NA$  of imaging objective, the theoretical axial resolution is  
395 estimated as 6.95  $\mu\text{m}$ . The theoretical depth of field (DOF) is half the axial resolution:

396 
$$DOF_{axial(th)} = \frac{n\lambda}{NA^2} \quad (5)$$

397 which is equal to 3.48  $\mu\text{m}$ .

398 Notably, these calculations assume that the detected light is emitted by a point source.  
399 However, scattering would tend to increase the Z-range of excitation, effectively increasing the  
400 axial resolution. Given the retina's scattering coefficient,  $\mu_s$ , the effective axial resolution is given  
401 by the convolution of the expanded profile of the light-sheet, the excitation point-spread function  
402 and the detection point-spread function. To first order, the point spread functions can be  
403 approximated by Gaussians, which yields the following equation for effective axial resolution:

404 
$$f(z_{axial(eff)}) = \left( c_1 \cdot e^{-\frac{(z_0-z)}{\mu_s}} \right) \cdot \left( c_2 \cdot e^{-\frac{(z_0-z)^2}{2\cdot\sigma_2^2}} \right) \cdot \left( c_3 \cdot e^{-\frac{(z_0-z)^2}{2\cdot(2\cdot z_{axial})^2}} \right) \quad (6)$$

405 Here,  $z_0$  defines the plane of light-sheet and  $\sigma_2$  is the beam waist. This effective DOF, which is  
406 twice the  $z_{axial(eff)}$ , was measured in the retina to be  $\sim 22 \mu\text{m}$  (Fig. 1f).

407

408 *Scattering of excitation light*

409 The retina has a scattering coefficient of  $\sim 57 \text{ cm}^{-1}$ <sup>17</sup>, compared to  $\sim 0.003 \text{ cm}^{-1}$  of water.  
410 This means that the excitation light will undergo significant scattering as it travels through the  
411 retina. A large fraction of the incident photons is absorbed by the GCaMP6f protein, while the  
412 remaining fraction is scattered above and below the plane of excitation. The light scattered above  
413 the excitation plane can potentially reach the photoreceptors and activate them<sup>22</sup>, thereby  
414 producing visual responses independent of the stimulus.

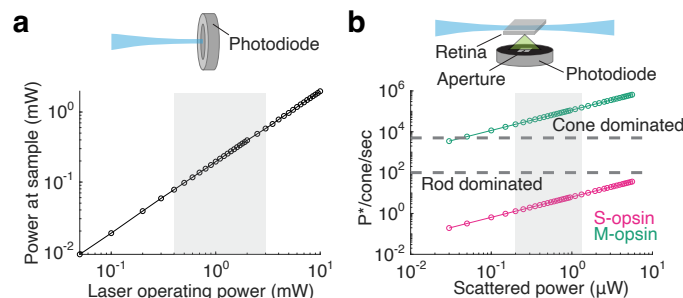

**Supplementary Figure 1: Photobleaching from scattered excitation light. (a)** Top: Schematized setup for measuring power at the sample location using a photodiode. Bottom: Measured power versus operating power of the laser. Gray shaded region shows the range of laser power used in a typical experiment. **(b)** Top: Schematic showing power of scattered light from the retina of Ai148;PVCre mouse, measured by a photodiode through a 2x2 mm<sup>2</sup> aperture. Bottom: Photoisomerization rate for M- and S-opsin cones as a function of the measure power of scattered light. Gray shaded region same as in (a).

415 To determine the degree of photoreceptor activation from scattered excitation light, we  
416 measured the total power of scattered light in the retina of an Ai148;PVCre mouse. Since scattered  
417 photons can travel along different directions, only a fraction of the scattered light reaches the  
418 photoreceptors. Therefore, to measure the intensity of scattered light that could activate  
419 photoreceptors, we used an aperture ~2 mm × 2 mm roughly matching the size of the imaged retina  
420 (Supplementary Fig.1 a, b insets). The intensity of scattered light was converted to  
421 photoisomerization (P\*) rate per cone expressing M- or S-opsin, using Baylor and Govardovskii  
422 nomograms<sup>52,53</sup>. Over a range of 0.1-3 mW laser power, the scattered light produced at most 10<sup>4</sup>  
423 P\*/M-cone/s (Supplementary Fig.1 a), and 1.0 P\*/S-cone/s (Fig. 2c), which is ~5 orders of  
424 magnitude lower than the photoisomerization rate produced by photopic UV stimulus<sup>22</sup> used in  
425 our experiments (Supplementary Fig.1 b).

426

#### 427 *Depth of field of imaging*

428 Diffraction-limited point objects such as fluorescent beads are commonly used for  
429 assessing the spatial resolution of a microscope<sup>16</sup>. We used 500 nm diameter fluorescent beads  
430 coated with green-fluorescent dye embedded in 2% agarose gel (Fig. 1c top) for measuring the  
431 depth of field. Images were acquired every 1 μm along the Z-axis, while keeping the Z-position  
432 of the sample and the excitation light-sheet unchanged. The (x, y) location of a bead was  
433 determined from the image with the bead in focus, and intensity was averaged over pixels within  
434 1 standard deviation around the peak centered at (x, y). Using images at different Z-positions, an  
435 intensity profile of the bead was measured as a function of the axial distance (Fig. 1d). Since the

436 detection objective collects more light from below the focal plane than above it, it leads to an  
437 asymmetrical intensity profile. Therefore, we symmetrized the intensity profile by reflecting the  
438 intensity curve about the excitation plane. By fitting a Gaussian function to the intensity profile  
439 and determining the full-width half maximum (FWHM) of the fit, we estimated the depth of field  
440 to be  $8.5 \pm 2.8 \mu\text{m}$ , averaged over  $n=63$  beads (Fig. 1d inset).

441

#### 442 *Histology*

443 Wholemout staining was performed on the retinas of Ai148;PVCre and Ai148;PCP2Cre  
444 mice. The retinas were fixed in 4% PFA for 45 minutes at room temperature and then incubated  
445 in 5% normal donkey serum (Jackson Immuno, C840D36) in 1X phosphate buffer saline (PBS)  
446 with azide (Santa Cruz Biotechnology, SC-296028) containing 0.5% Triton X-100 (Sigma  
447 Aldrich, 93443), overnight at 4C. The retinas were then incubated in primary antibodies on a rocker  
448 for 3-5 days at 4C, after which they were rinsed in 1X PBS and incubated in secondary antibodies  
449 overnight at 4C on a rocker. The retinas were then rinsed in 1X PBS, placed on a filter paper and  
450 mounted on a glass slide with sealed coverslips. For cryosections, after fixation the retinas were  
451 incubated in 30% sucrose/PBS for 4-5 hours, frozen in OCT (VWR, 25608-930) and then  
452 sectioned at 15-20  $\mu\text{m}$  thickness. The mounted retinas were imaged with a laser scanning confocal  
453 microscope (Nikon Instruments, Inc., Ti-2) using 20x/40x/60x air objective. The Z-stack of images  
454 were processed in FIJI software<sup>54</sup>, to identify laminae and GCaMP expressing cells.

455 The following primary antibodies were used: anti-GFP (1:1000, Rockland, 600-901-215),  
456 anti-ChAT (1:500, Millipore Sigma, AB144P), anti-PCP2 (1:500, Santa Cruz Biotechnology, Inc.  
457 sc-137064). Secondary antibodies conjugated to Alexa 488 (1:500; Invitrogen, A-11094), Alexa  
458 555 (1:500; Invitrogen, A20187), and Alexa 647 (1:500; Invitrogen, A-21447), were each diluted  
459 at 1:500. DAPI (Molecular Probes, S36964) was used for nuclear staining.

460

#### 461 *Active ROIs, calcium responses and inferred spikes*

462 To eliminate noisy, out-of-focus structures near the boundary of the imaged retina, a  
463 rectangular area containing the active ROIs was selected. Non-uniform illumination was corrected  
464 by homomorphic filtering and stripe artifacts caused by scattering of excitation beam were  
465 removed by spatial high pass filtering<sup>55</sup>. Size of a template ROI was determined by first manually  
466 selecting contours around active somas (for RGCs) or active synapses (for BCs), and then

467 estimating a mean radius from the ellipses fitted to the selected ROIs. The images were denoised  
468 by a Kalman Filter and were batch processed using the CNMF-E algorithm<sup>25</sup> to extract the time-  
469 varying fluorescence traces,

$$470 \quad F_j(t) = A^{-1}(Y_j(t) - B_{0j} - B_j(t) - N_j(t)) \quad (7)$$

471 where  $j$  corresponds to the ROI index,  $F_j(t)$  is the time varying fluorescent trace,  $A$  is the spatial  
472 matrix,  $Y_j(t)$  is the raw trace,  $B_{0j}$  is the constant background,  $B_j(t)$  is the time varying background  
473 and  $N_j(t)$  is the time-varying noise. Manual verification was performed to remove overlapping  
474 ROIs and false positives. Steady drift in baseline fluorescence was corrected by subtracting the  
475 rolling 10<sup>th</sup> quantile over a local time window from the raw trace. An estimate of  $\Delta F(t)/F_0$  were  
476 obtained from the fluorescent trace prior to subtracting the baseline. The peak signal to noise ratio  
477 is given by the ratio of the average peak fluorescence of calcium transients to the standard deviation  
478 of the drift-subtracted baseline fluorescence:

$$479 \quad SNR_{peak} = \frac{\langle F_{peak}(t) \rangle}{\langle N(t) \rangle} \quad (8)$$

480 To infer spikes from temporal fluorescent traces, the calcium transients were first fit using an  
481 autoregressive model of order 1. The modeled transients were then deconvolved from the  
482 fluorescent trace to estimate spike count  $s_j(t)$ :

$$483 \quad s_j(t) = F_j(t) - k_{1j}F_j(t) \quad (9)$$

484 where,  $j$  corresponds to the  $j$ 'th ROI, and  $k_{1j}$  corresponds to the first coefficient of the  
485 autoregressive model for the  $j$ 'th ROI.

486

#### 487 *Response clustering and RGC classification*

488 To cluster RGCs into different groups, trial-averaged responses to the chirp stimulus were  
489 used. Principal components were calculated using the full ensemble of trial-averaged responses.  
490 The responses of each RGC were then projected onto the leading principal components that  
491 accounted for at least 80% of the variance (Fig. 3c). A Gaussian mixture model (GMM) with  
492 expectation maximization algorithm was fit to the projection values in the N-dimensional  
493 hyperspace with a pre-defined number of clusters determined from cross-validated Silhouette  
494 optimality test and Bayesian Information Criterion (BIC)<sup>56</sup>. Response clustering was tested with  
495 alternative methods: Hierarchical agglomerative clustering (HAC) and Spectral clustering (SC).  
496 (Supplementary Fig. 2). Since each functionally distinct RGC type tiles the retinal space<sup>28</sup>, the

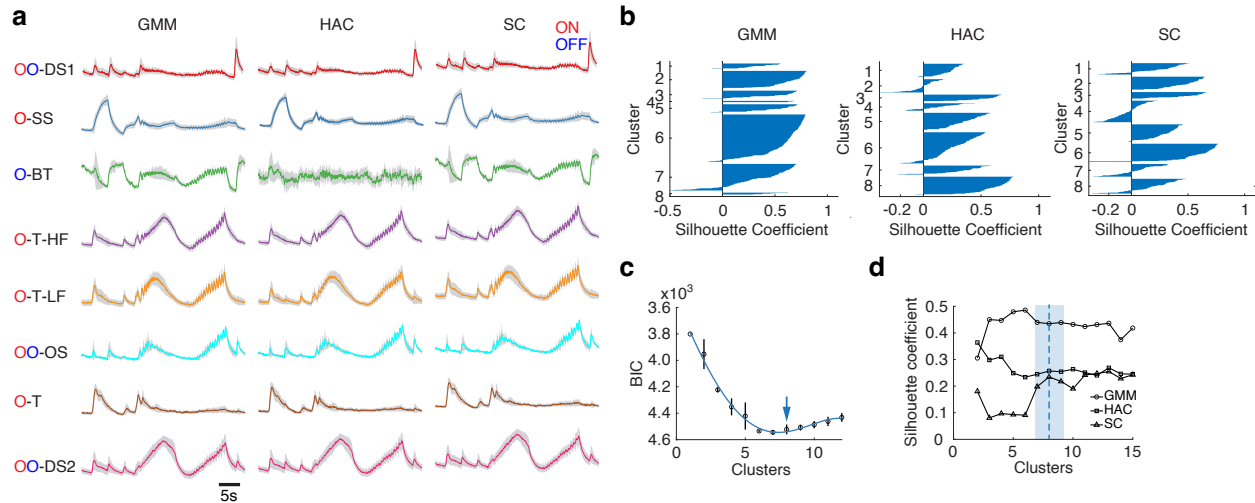

**Supplementary Figure 2: Comparison of response clustering using different algorithms.** (a) RGCs clustered into distinct functional types based on clustering of responses to the chirp stimulus using: (1) Gaussian mixture model (GMM), (2) Hierarchical agglomerative clustering (HAC) and (3) Spectral clustering (SC). Results are representative of data shown in Fig. 3. ON: O (red), OFF: O (blue); DS: direction selective; SS: slow sustained; BT: brisk transient; T-HF: transient high frequency; T-LF: transient low frequency; OS: orientation selective; T: transient. Solid colored line: Mean population response. Gray shaded error bar: SD. (b) Silhouette test of optimality of cluster size for GMM, HAC and SC clustering methods. Shaded area shows silhouette coefficient (see Methods) for each cluster size. (c) Bayesian Information Criterion (BIC) for different number of clusters applied to the GMM fit. Black circles: Criterion values. Black vertical line: SD from  $n=100$  iterations of model fit. Blue solid line: Polynomial fit. Blue arrow: Optimal number of clusters that distinguishes different response types. (d) Mean Silhouette coefficient for different number of clusters from each clustering method, GMM, HAC and SC, each indicated by a different marker type. Blue shaded region: Approximate range of cluster size with highest coefficient values across the three clustering methods. Dashed vertical line: Optimal cluster size.

497 nearest-neighbor distance (NND) was computed for each cluster of RGCs (Fig. 3 g-h). Spike  
 498 counts were obtained by the method described above (Eq. 9), and the number of spikes  
 499 corresponding to the count was uniformly distributed across the bin to obtain spike times. Trial-  
 500 to-trial variability was estimated using both calcium responses and inferred spike times, for  
 501 different groups of RGCs (Supplementary Fig. 3d).

502

### 503 *Optimality and accuracy of clustering*

504 To determine the quality of GMM fit to the projection values, we estimated Bayesian  
 505 Information Criterion (BIC) values for different cluster sizes. The BIC value is defined as:

$$506 \quad BIC(k) = -2 \ln(L) + k \ln(n) \quad (10)$$

507  $L$  is the maximum of Bayes likelihood,  $k$  is the number of estimated clusters and  $n$  is the number  
 508 neurons. Since HAC and SC do not rely on model fits, optimality of cluster size was assessed by  
 509 estimating the Silhouette coefficient for different cluster sizes using different clustering methods.

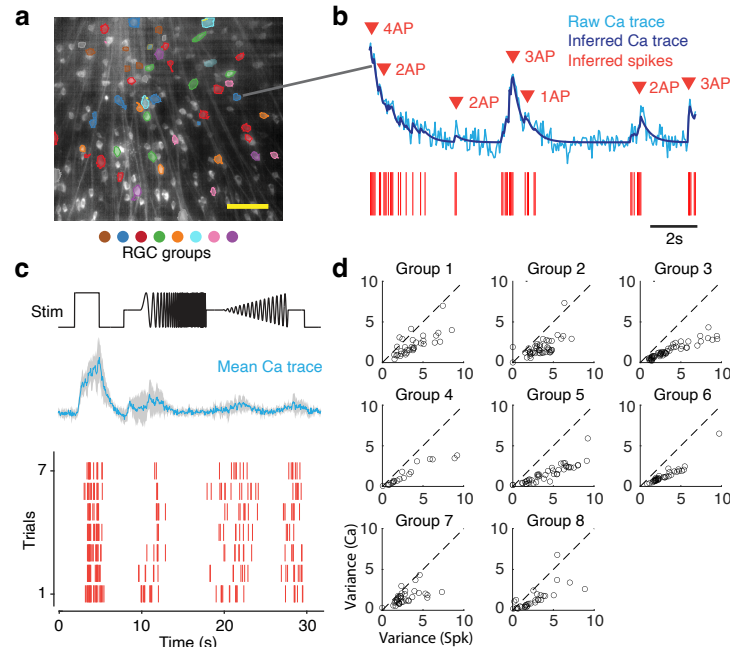

**Supplementary Figure 3: Statistics of inferred spikes of RGCs.** (a) Median projection image showing RGCs belonging to different types (colored circles). Scale bar: 100  $\mu\text{m}$ . (b) Spikes inferred from deconvolved filtered fluorescence trace (dark blue). Unfiltered trace in light blue and inferred spikes in red. The number and timing of action potentials (APs) are indicated by red arrows. (c) Top: Chirp stimulus trace (black). Middle: Trial averaged ( $n_{\text{trial}}=7$ ) calcium responses of a representative RGC (solid blue line). Shaded error bar: SD. Bottom: Inferred spike times across trials. (d) Trial-to-trial variance of calcium responses and inferred spikes for each type of RGCs ( $n=8$  types). Black circles: Individual RGCs.

510 For each cluster size, the Silhouette coefficient  $S(i)$  for the  $i$ 'th point in a cluster was calculated  
 511 as:

$$512 \quad S(i) = \frac{b(i) - a(i)}{\max(a(i), b(i))} \quad (11)$$

513 where,  $a(i)$  is the mean distance from the  $i$ 'th point to all other points in the cluster and  $b(i)$  is the  
 514 minimum of all distances from the  $i$ 'th point to all other points in all other clusters. Normalized  
 515 peri-stimulus time histograms of fluorescent traces were used for clustering and Silhouette  
 516 coefficients were calculated for  $n=100$  iterations for each cluster size. The cluster size with the  
 517 highest ratio of median to absolute median deviation was chosen as optimal (Supplementary Fig.2).  
 518 For GMM, both the Silhouette coefficient and Bayesian Information Criterion for model fits were  
 519 used to cross-validate the optimal cluster size.

520 To determine clustering accuracy, responses were first clustered using three different  
 521 clustering methods: GMM, HAC and SC, using a pre-defined cluster size. The median population  
 522 temporal response for each cluster was then used to calculate pairwise correlation between  
 523 responses, for each clustering method. Groups from each clustering method, with the highest

524 pairwise response correlation, were assigned to the same functional type. The nearest-neighbor  
525 distances between RGCs for each group were assayed to confirm that the RGCs belonged to a  
526 unique functional type.

527

### 528 *Quantification of stimulus preference*

529 Directional preference was quantified by the Direction Selective Index (DSI):

$$530 \quad DSI = \frac{|\sum R(\theta_j)e^{i\theta_j}|}{\sum |R(\theta_j)|} = \frac{|\sum (\int F_{\theta_j}(t)dt)e^{i\theta_j}|}{\sum |\int F_{\theta_j}(t)dt|} \quad (12)$$

531 where  $R(\theta_j)$  corresponds to the area under calcium fluorescence response curve ( $F_{\theta_j}(t)$ ) for a  
532 100% contrast bright bar on a dark background moving along the direction  $\theta_j$ . RGCs with  $DSI > 0.3$   
533 were selected as DS-RGCs<sup>34</sup>. ON-OFF DS-RGCs were identified by two response peaks,  
534 corresponding to the ON and OFF responses to the entry and exit of the bar over the receptive field  
535 (Fig. 4b).

536 Orientation preference was quantified by the Orientation Selective Index (OSI):

$$537 \quad OSI = \frac{|\sum R(\theta_j)e^{2i\theta_j}|}{\sum |R(\theta_j)|} = \frac{|\sum (\int F_{\theta_j}(t)dt)e^{2i\theta_j}|}{\sum |\int F_{\theta_j}(t)dt|} \quad (13)$$

538 where  $R(\theta_j)$  corresponds to the area under calcium fluorescence response curve ( $F_{\theta_j}(t)$ ) for a  
539 100% contrast grating oriented along  $\theta_j$ . All RGCs with  $OSI > 0.3$  and  $DSI < 0.3$  were selected as  
540 OS-RGCs<sup>34</sup>. The grating moved in 12 directions at a speed of 24  $\mu\text{m}/\text{sec}$ , repeated 5 times.

541

### 542 *Receptive field estimation*

543 Black and white checkerboard patterns with checker size ranging between 15-50  $\mu\text{m}$ ,  
544 refreshing at 60 Hz, were used to characterize spatiotemporal receptive field (RF) of RGCs.  
545 Temporal calcium traces were low pass filtered, and then spikes were inferred using methods  
546 described above (Eq. 9). The sequence of checkerboard images  $I(x, y)$  preceding each spike  $s(t_j)$   
547 was weighted by the inferred spike count and averaged over the number of spike events to obtain  
548 the spatiotemporal RF.

$$549 \quad RF(x, y, \tau) = \frac{1}{N} \sum_{j=1}^N s(t_j) \cdot I(x, y, t_j + \tau) \quad (14)$$

550 Here,  $N$  is the total number of spikes and  $\tau$  is the time lag between a spike and a preceding image.

551 Calcium transients have a decay time of 300-400 ms<sup>7</sup>, therefore images presented over a 300 ms  
552 window preceding a spike event (i.e.,  $\tau < 0.3$  s), were used for estimating the temporal RF. The  
553 mean spatial image at each time lag was spatially filtered with a Gaussian of standard deviation 25  
554  $\mu\text{m}$ . The pixel values from the spatially filtered image within a 300  $\mu\text{m}$  window centered around  
555 the RGC soma:  $(c_x, c_y)$  were averaged at each time lag to obtain the temporal RF.

$$556 \quad RF(\tau) = \frac{1}{J \cdot K} \sum_{x=c_x-J/2, y=c_y-K/2}^{J/2, K/2} RF(x - c_x, y - c_y, \tau) \quad (15)$$

557 The temporal RF was fit with a parametric function  $g(t)$

$$558 \quad g(t) = a_1 \left(\frac{t}{b_1}\right)^{c_1} \cdot e^{-\left(\frac{c_1 \cdot t}{b_1}\right)} + a_2 \left(\frac{t}{b_2}\right)^{c_2} \cdot e^{-\left(\frac{c_2 \cdot t}{b_2}\right)} \quad (16)$$

559 and the mean image corresponding to the closest peak (for ON RGC) or trough (for OFF RGC) to  
560 the spike event was used as the representative 2-D spatial RF. The RF center was fitted with a two-  
561 dimensional Gaussian with 1 SD boundary around the center maximum or minimum.

562

### 563 *BC response characterization*

564 For extracting the ROIs for each release site, the following threshold values were used: (1)  
565 peak signal to noise ratio ( $\text{SNR}_{\text{peak}} = 2$ ), (2) spatiotemporal pixel intensity correlation = 0.7, and  
566 (3) ROI template diameter = 1-4  $\mu\text{m}$ . After ROI extraction, duplicate and overlapping ROIs were  
567 manually removed. Fluorescence transients associated with the spot stimulus were identified by  
568 using a threshold value 5 times the median absolute deviation (MAD) of the entire temporal  
569 response. The peak signal to noise ratio, rise time, and decay time were used to characterize the  
570 kinetics of the response transients. The time constant for decay was obtained from an exponential  
571 fit to the temporal response curve within a 4 s window following the response peak. Positive  
572 (negative) contrast preference was determined by an increase followed by a decrease in calcium  
573 fluorescence to the appearance followed by disappearance of a bright (dark) spot.

574

### 575 *Statistical analysis*

576 Statistical analyses of data were done using custom scripts written in MATLAB  
577 (Mathworks, Natick, MA) and CAIMAN codebase<sup>25</sup>. Summary data are presented as mean  
578  $\pm$  SEM, mean  $\pm$  SD, or median  $\pm$  MAD, as noted in figure legends or text. Statistical significance  
579 was determined from P-values with appropriate corrections for multiple samples of different sizes.



580 Optimality and reliability of clustering were determined using K-means distance, Silhouette  
581 Coefficient and Bayesian Information Criterion.

582

### 583 **Acknowledgements**

584 This work was supported by NIH Brain Initiative Grant 1R34NS111645-01 (G.D.F.) and  
585 NIH K99EY032119 award (S.R.). We thank members of the Field lab for comments on the  
586 manuscript.

587

### 588 **Author contributions**

589 S.R., A.S., and G.D.F. conceived the study. S.R., D.W. and Y.G. designed the microscope.  
590 A.M.R. helped design and test the retina chamber. S.R. calibrated the imaging system, performed  
591 the experiments, and developed a pipeline for image analysis. S.R. and B.P. analyzed the data.  
592 M.T. and M.L.S. assisted with mouse genetics and planning. S.R. and G.D.F. wrote the manuscript.  
593 A.S. and Y.G. helped edit the manuscript.

594

### 595 **Competing interests**

596 The authors declare no competing interests.

597

598

599

600

601

602

603

604

605

606

607

608

609

610

611

612 **References**

- 613
- 614 1 Baden, T. *et al.* The functional diversity of retinal ganglion cells in the mouse. *Nature*
- 615 **529**, 345-350 (2016). <https://doi.org/10.1038/nature16468>
- 616 2 Ota, K. *et al.* Fast, cell-resolution, contiguous-wide two-photon imaging to reveal
- 617 functional network architectures across multi-modal cortical areas. *Neuron* **109**, 1810-
- 618 1824 e1819 (2021). <https://doi.org/10.1016/j.neuron.2021.03.032>
- 619 3 Svoboda, K. & Yasuda, R. Principles of two-photon excitation microscopy and its
- 620 applications to neuroscience. *Neuron* **50**, 823-839 (2006).
- 621 <https://doi.org/10.1016/j.neuron.2006.05.019>
- 622 4 Denk, W., Strickler, J. H. & Webb, W. W. Two-photon laser scanning fluorescence
- 623 microscopy. *Science* **248**, 73-76 (1990). <https://doi.org/10.1126/science.2321027>
- 624 5 Poleg-Polsky, A. & Diamond, J. S. Retinal Circuitry Balances Contrast Tuning of
- 625 Excitation and Inhibition to Enable Reliable Computation of Direction Selectivity. *J*
- 626 *Neurosci* **36**, 5861-5876 (2016). <https://doi.org/10.1523/JNEUROSCI.4013-15.2016>
- 627 6 Akerboom, J. *et al.* Optimization of a GCaMP calcium indicator for neural activity
- 628 imaging. *J Neurosci* **32**, 13819-13840 (2012). [https://doi.org/10.1523/JNEUROSCI.2601-](https://doi.org/10.1523/JNEUROSCI.2601-12.2012)
- 629 [12.2012](https://doi.org/10.1523/JNEUROSCI.2601-12.2012)
- 630 7 Dana, H. *et al.* High-performance calcium sensors for imaging activity in neuronal
- 631 populations and microcompartments. *Nat Methods* **16**, 649-657 (2019).
- 632 <https://doi.org/10.1038/s41592-019-0435-6>
- 633 8 Masland, R. H. The neuronal organization of the retina. *Neuron* **76**, 266-280 (2012).
- 634 <https://doi.org/10.1016/j.neuron.2012.10.002>
- 635 9 Nadal-Nicolas, F. M. *et al.* True S-cones are concentrated in the ventral mouse retina and
- 636 wired for color detection in the upper visual field. *Elife* **9** (2020).
- 637 <https://doi.org/10.7554/eLife.56840>
- 638 10 Huberman, A. D. & Niell, C. M. What can mice tell us about how vision works? *Trends*
- 639 *Neurosci* **34**, 464-473 (2011). <https://doi.org/10.1016/j.tins.2011.07.002>
- 640 11 Laboissonniere, L. A. *et al.* Molecular signatures of retinal ganglion cells revealed
- 641 through single cell profiling. *Sci Rep* **9**, 15778 (2019). [https://doi.org/10.1038/s41598-](https://doi.org/10.1038/s41598-019-52215-4)
- 642 [019-52215-4](https://doi.org/10.1038/s41598-019-52215-4)
- 643 12 Munch, T. A. *et al.* Approach sensitivity in the retina processed by a multifunctional
- 644 neural circuit. *Nat Neurosci* **12**, 1308-1316 (2009). <https://doi.org/10.1038/nn.2389>
- 645 13 Lu, Q., Ivanova, E., Ganjawala, T. H. & Pan, Z. H. Cre-mediated recombination
- 646 efficiency and transgene expression patterns of three retinal bipolar cell-expressing Cre
- 647 transgenic mouse lines. *Mol Vis* **19**, 1310-1320 (2013).
- 648 14 Ferguson, L. R., Dominguez, J. M., 2nd, Balaiya, S., Grover, S. & Chalam, K. V. Retinal
- 649 Thickness Normative Data in Wild-Type Mice Using Customized Miniature SD-OCT.
- 650 *PLoS One* **8**, e67265 (2013). <https://doi.org/10.1371/journal.pone.0067265>
- 651 15 Remacha, E., Friedrich, L., Vermot, J. & Fahrenbach, F. O. How to define and optimize
- 652 axial resolution in light-sheet microscopy: a simulation-based approach. *Biomed Opt*
- 653 *Express* **11**, 8-26 (2020). <https://doi.org/10.1364/BOE.11.000008>
- 654 16 Jvakaitis & Wilson. The measurement of the amplitude point spread function of
- 655 microscope objective lenses. *Journal of Microscopy* **189** (1998).
- 656 17 Jacques, S. L. Optical properties of biological tissues: a review. *Phys Med Biol* **58**, R37-
- 657 61 (2013). <https://doi.org/10.1088/0031-9155/58/11/R37>

- 658 18 Sardar, D. K., Yow, R. M., Tsin, A. T. & Sardar, R. Optical scattering, absorption, and  
659 polarization of healthy and neovascularized human retinal tissues. *J Biomed Opt* **10**,  
660 051501 (2005). <https://doi.org/10.1117/1.2065867>
- 661 19 Calkins, D. J., Tsukamoto, Y. & Sterling, P. Microcircuitry and mosaic of a blue-yellow  
662 ganglion cell in the primate retina. *J Neurosci* **18**, 3373-3385 (1998).
- 663 20 Pan, Z. H., Hu, H. J., Perring, P. & Andrade, R. T-type Ca(2+) channels mediate  
664 neurotransmitter release in retinal bipolar cells. *Neuron* **32**, 89-98 (2001).  
665 [https://doi.org/10.1016/s0896-6273\(01\)00454-8](https://doi.org/10.1016/s0896-6273(01)00454-8)
- 666 21 Lyubarsky, A. L., Falsini, B., Pennesi, M. E., Valentini, P. & Pugh, E. N., Jr. UV- and  
667 midwave-sensitive cone-driven retinal responses of the mouse: a possible phenotype for  
668 coexpression of cone photopigments. *J Neurosci* **19**, 442-455 (1999).
- 669 22 Naarendorp, F. *et al.* Dark light, rod saturation, and the absolute and incremental  
670 sensitivity of mouse cone vision. *J Neurosci* **30**, 12495-12507 (2010).  
671 <https://doi.org/10.1523/JNEUROSCI.2186-10.2010>
- 672 23 Jo, A. *et al.* Intersectional Strategies for Targeting Amacrine and Ganglion Cell Types in  
673 the Mouse Retina. *Front Neural Circuits* **12**, 66 (2018).  
674 <https://doi.org/10.3389/fncir.2018.00066>
- 675 24 Kim, T. J. & Jeon, C. J. Morphological classification of parvalbumin-containing retinal  
676 ganglion cells in mouse: single-cell injection after immunocytochemistry. *Invest*  
677 *Ophthalmol Vis Sci* **47**, 2757-2764 (2006). <https://doi.org/10.1167/iovs.05-1442>
- 678 25 Zhou, P. *et al.* Efficient and accurate extraction of in vivo calcium signals from  
679 microendoscopic video data. *Elife* **7** (2018). <https://doi.org/10.7554/eLife.28728>
- 680 26 Rokach, L. & Maimon, O. in *Data Mining and Knowledge Discovery Handbook* (eds  
681 Oded Maimon & Lior Rokach) 321-352 (Springer US, 2005).
- 682 27 Jordan, M. I. & Weiss, Y. in *Advances in Neural Information Processing Systems:*  
683 *Proceedings of the 2001 Conference.* 849 (MIT Press).
- 684 28 Roy, S., Jun, N. Y., Davis, E. L., Pearson, J. & Field, G. D. Inter-mosaic coordination of  
685 retinal receptive fields. *Nature* **592**, 409-413 (2021). [https://doi.org/10.1038/s41586-021-](https://doi.org/10.1038/s41586-021-03317-5)  
686 [03317-5](https://doi.org/10.1038/s41586-021-03317-5)
- 687 29 Devries, S. H. & Baylor, D. A. Mosaic arrangement of ganglion cell receptive fields in  
688 rabbit retina. *J Neurophysiol* **78**, 2048-2060 (1997).  
689 <https://doi.org/10.1152/jn.1997.78.4.2048>
- 690 30 Field, G. D. & Chichilnisky, E. J. Information processing in the primate retina: circuitry  
691 and coding. *Annu Rev Neurosci* **30**, 1-30 (2007).  
692 <https://doi.org/10.1146/annurev.neuro.30.051606.094252>
- 693 31 Wassle, H., Boycott, B. B. & Illing, R. B. Morphology and mosaic of on- and off-beta  
694 cells in the cat retina and some functional considerations. *Proc R Soc Lond B Biol Sci*  
695 **212**, 177-195 (1981). <https://doi.org/10.1098/rspb.1981.0033>
- 696 32 Ravi, S., Ahn, D., Greschner, M., Chichilnisky, E. J. & Field, G. D. Pathway-Specific  
697 Asymmetries between ON and OFF Visual Signals. *J Neurosci* **38**, 9728-9740 (2018).  
698 <https://doi.org/10.1523/JNEUROSCI.2008-18.2018>
- 699 33 Yao, X. *et al.* Gap Junctions Contribute to Differential Light Adaptation across  
700 Direction-Selective Retinal Ganglion Cells. *Neuron* **100**, 216-228 e216 (2018).  
701 <https://doi.org/10.1016/j.neuron.2018.08.021>
- 702 34 Ray, T. A. *et al.* Formation of retinal direction-selective circuitry initiated by starburst  
703 amacrine cell homotypic contact. *Elife* **7** (2018). <https://doi.org/10.7554/eLife.34241>

- 704 35 Ding, H., Smith, R. G., Poleg-Polsky, A., Diamond, J. S. & Briggman, K. L. Species-  
705 specific wiring for direction selectivity in the mammalian retina. *Nature* **535**, 105-110  
706 (2016). <https://doi.org/10.1038/nature18609>
- 707 36 Ivanova, E., Hwang, G. S. & Pan, Z. H. Characterization of transgenic mouse lines  
708 expressing Cre recombinase in the retina. *Neuroscience* **165**, 233-243 (2010).  
709 <https://doi.org/10.1016/j.neuroscience.2009.10.021>
- 710 37 Ivanova, E., Lee, P. & Pan, Z. H. Characterization of multiple bistratified retinal ganglion  
711 cells in a purkinje cell protein 2-Cre transgenic mouse line. *J Comp Neurol* **521**, 2165-  
712 2180 (2013). <https://doi.org/10.1002/cne.23279>
- 713 38 Thoreson, W. B. & Ulphani, J. S. Pharmacology of selective and non-selective  
714 metabotropic glutamate receptor agonists at L-AP4 receptors in retinal ON bipolar cells.  
715 *Brain Res* **676**, 93-102 (1995). [https://doi.org/10.1016/0006-8993\(95\)00093-6](https://doi.org/10.1016/0006-8993(95)00093-6)
- 716 39 Bae, J. A. *et al.* Digital Museum of Retinal Ganglion Cells with Dense Anatomy and  
717 Physiology. *Cell* **173**, 1293-1306 e1219 (2018).  
718 <https://doi.org/10.1016/j.cell.2018.04.040>
- 719 40 Huisken, J., Swoger, J., Del Bene, F., Wittbrodt, J. & Stelzer, E. H. Optical sectioning  
720 deep inside live embryos by selective plane illumination microscopy. *Science* **305**, 1007-  
721 1009 (2004). <https://doi.org/10.1126/science.1100035>
- 722 41 Keller, P. J. *et al.* Fast, high-contrast imaging of animal development with scanned light  
723 sheet-based structured-illumination microscopy. *Nat Methods* **7**, 637-642 (2010).  
724 <https://doi.org/10.1038/nmeth.1476>
- 725 42 Chen, B. C. *et al.* Lattice light-sheet microscopy: imaging molecules to embryos at high  
726 spatiotemporal resolution. *Science* **346**, 1257998 (2014).  
727 <https://doi.org/10.1126/science.1257998>
- 728 43 Truong, T. V., Supatto, W., Koos, D. S., Choi, J. M. & Fraser, S. E. Deep and fast live  
729 imaging with two-photon scanned light-sheet microscopy. *Nat Methods* **8**, 757-760  
730 (2011). <https://doi.org/10.1038/nmeth.1652>
- 731 44 Diamond, J. S. Inhibitory Interneurons in the Retina: Types, Circuitry, and Function.  
732 *Annu Rev Vis Sci* **3**, 1-24 (2017). <https://doi.org/10.1146/annurev-vision-102016-061345>
- 733 45 Park, S. J. H. *et al.* Convergence and Divergence of CRH Amacrine Cells in Mouse  
734 Retinal Circuitry. *J Neurosci* **38**, 3753-3766 (2018).  
735 <https://doi.org/10.1523/JNEUROSCI.2518-17.2018>
- 736 46 Ruda, K., Zylberberg, J. & Field, G. D. Ignoring correlated activity causes a failure of  
737 retinal population codes. *Nat Commun* **11**, 4605 (2020). [https://doi.org/10.1038/s41467-  
738 020-18436-2](https://doi.org/10.1038/s41467-020-18436-2)
- 739 47 Qian, Y. *et al.* A genetically encoded near-infrared fluorescent calcium ion indicator. *Nat*  
740 *Methods* **16**, 171-174 (2019). <https://doi.org/10.1038/s41592-018-0294-6>
- 741 48 Shemesh, O. A. *et al.* Precision Calcium Imaging of Dense Neural Populations via a Cell-  
742 Body-Targeted Calcium Indicator. *Neuron* **107**, 470-486 e411 (2020).  
743 <https://doi.org/10.1016/j.neuron.2020.05.029>
- 744 49 Fahrbach, F. O., Voigt, F. F., Schmid, B., Helmchen, F. & Huisken, J. Rapid 3D light-  
745 sheet microscopy with a tunable lens. *Opt Express* **21**, 21010-21026 (2013).  
746 <https://doi.org/10.1364/OE.21.021010>
- 747 50 Doi, E. *et al.* Efficient coding of spatial information in the primate retina. *J Neurosci* **32**,  
748 16256-16264 (2012). <https://doi.org/10.1523/JNEUROSCI.4036-12.2012>

- 749 51 Born, M. & Wolf, E. *Principles of optics: electromagnetic theory of propagation,*  
750 *interference and diffraction of light.* (Elsevier, 2013).
- 751 52 Baylor, D. A. Photoreceptor signals and vision. Proctor lecture. *Invest Ophthalmol Vis*  
752 *Sci* **28**, 34-49 (1987).
- 753 53 Govardovskii, V. I., Fyhrquist, N., Reuter, T., Kuzmin, D. G. & Donner, K. In search of  
754 the visual pigment template. *Vis Neurosci* **17**, 509-528 (2000).  
755 [https://doi.org:10.1017/s0952523800174036](https://doi.org/10.1017/s0952523800174036)
- 756 54 Schindelin, J. *et al.* Fiji: an open-source platform for biological-image analysis. *Nat*  
757 *Methods* **9**, 676-682 (2012). <https://doi.org:10.1038/nmeth.2019>
- 758 55 Swaney, J. *et al.* Scalable image processing techniques for quantitative analysis of  
759 volumetric biological images from light-sheet microscopy. *bioRxiv*, 576595 (2019).  
760 <https://doi.org:10.1101/576595>
- 761 56 Schwarz, G. Estimating the dimension of a model. *The annals of statistics*, 461-464  
762 (1978).  
763
